# Supplementary material for: A Cyclic Peptidic Serine Protease Inhibitor: Increasing Affinity by Increasing Peptide Flexibility
Source: PLoS One. 2014 Dec 29;9(12):e115872. doi: 10.1371/journal.pone.0115872 (PMC4278837; doi:10.1371/journal.pone.0115872)
Supplement: S3 Fig — SPR analysis of peptide-enzyme binding. (DOC) [file pone.0115872.s003.doc]

**Supporting Figure S3. SPR analysis of peptide-enzyme binding.** The figure shows representative examples of sensorgrams of analysis of peptide-enzyme binding kinetics. huPA-H99Y was immobilized on a CM5 chip to a level of approximately 500 RU. The peptides were applied to the chip in the following concentration series: Mupain-1, 0.1 – 100 M; mupain-1-12, 0.025 – 25 M; mupain-1-16, 0.01 – 10 M. The experimental sensorgrams are shown in red and the curve fits in black. The fitted curves correspond to *k*on = 0.509 x 105M-1s-1, *k*off = 80.3 x 10-2 s-1¸ *K*D = 15.8 M (mupain-1); *k*on = 1.88 x 105M-1s-1, *k*off = 24.8 x 10-2 s-1¸ *K*D = 1.32 M (mupain-1-12); *k*on = 1.01 x 105M-1s-1, *k*off = 9.29 x 10-2 s-1¸ *K*D = 0.920 M (mupain-1-16). A summary of the results obtained in all experiments performed is given in Table 4 in the main text.

**
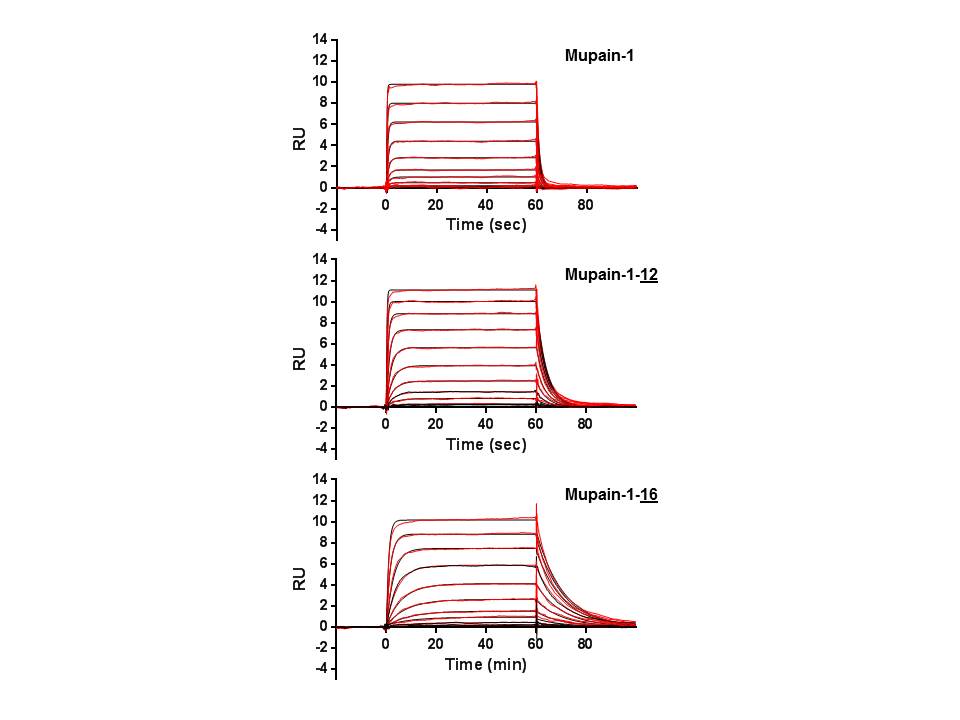
**
