# Supplementary material for: A Cyclic Peptidic Serine Protease Inhibitor: Increasing Affinity by Increasing Peptide Flexibility
Source: PLoS One. 2014 Dec 29;9(12):e115872. doi: 10.1371/journal.pone.0115872 (PMC4278837; doi:10.1371/journal.pone.0115872)
Supplement: S3 Table — Distances between mupain-1 and huPA-H99Y residues in the crystal structure. (DOC) [file pone.0115872.s007.doc]

**Supporting Table S3. Distances between mupain-1 and huPA-H99Y residues in the crystal structure**

| **Mupain-1 residue** | **huPA-H99Y residue** | **Distance, Å** |
| --- | --- | --- |
| Ala3 N | Thr97a O | 2.68 |
| Tyr4 N | Leu97b O | 3.17 |
| Tyr4 OH | Arg217 NH1 | 3.47 |
| Ser5 O | Tyr99 OH | 2.18 |
| Arg6 N2 | Gly219 O | 2.79 |
| Arg6 N2 | Asp189 O2 | 2.68 |
| Arg6 N1 | Asp189 O1 | 3.14 |
| Arg6 N1 | Ser190 O | 3.33 |
| Arg6 N1 | Ser190 O | 2.67 |
| Arg6 O | Gly193 N | 2.84 |
| Tyr7 OH | Arg35 NH1 | 3.13 |
| Tyr7 OH | Arg35 NH2 | 3.20 |
| Tyr7 OH | Cys58 O | 2.74 |
| Tyr7 O | Gln192 N2 | 3.03 |
| Leu8 O | Gln192 N2 | 2.67 |
| Asp9 O1 | Arg35 NH1 | 2.27 |
| Cys10 O | Gln192 N2 | 3.46 |
