# Supplementary material for: A Cyclic Peptidic Serine Protease Inhibitor: Increasing Affinity by Increasing Peptide Flexibility
Source: PLoS One. 2014 Dec 29;9(12):e115872. doi: 10.1371/journal.pone.0115872 (PMC4278837; doi:10.1371/journal.pone.0115872)
Supplement: S4 Table — Distances between mupain-1-12 residues and huPA-H99Y residues in the crystal structure. (DOC) [file pone.0115872.s008.doc]

**Supporting Table S4. Distances between mupain-1-12 residues and huPA-H99Y residues in the crystal structure**

| **Mupain-1-12 residue** | **huPA-H99Y residue** | **Distance, Å** |
| --- | --- | --- |
| Ala3 N | Thr97A O | 2.72 |
| Tyr4 O | Gly216 N | 2.96 |
| Tyr4 N | Leu97B O | 3.28 |
| Ser5 O | Tyr99 OH | 2.26 |
| [CPAYS[4-guanidino-phenyl-alanine]YLDC]6 N1 | Gly216 O | 3.52 |
| [CPAYS[4-guanidino-phenyl-alanine]YLDC]6 N1 | Gly219 O | 2.48 |
| [CPAYS[4-guanidino-phenyl-alanine]YLDC]6 N2 | Asp189 O1 | 2.88 |
| [CPAYS[4-guanidino-phenyl-alanine]YLDC]6 N2 | Ser190 O | 2.98 |
| [CPAYS[4-guanidino-phenyl-alanine]YLDC]6 N2 | Ser190 O | 3.09 |
| [CPAYS[4-guanidino-phenyl-alanine]YLDC]6 N3 | Asp189 O1 | 3.35 |
| [CPAYS[4-guanidino-phenyl-alanine]YLDC]6 N3 | Asp189 O2 | 2.63 |
| [CPAYS[4-guanidino-phenyl-alanine]YLDC]6 N3 | Gly219 O | 3.09 |
| [CPAYS[4-guanidino-phenyl-alanine]YLDC]6 O | Gly193 N | 3.01 |
| Tyr7 OH | Arg35 NH1 | 3.37 |
| Tyr7 OH | Arg35 NH2 | 3.58 |
| Tyr7 OH | Cys58 O | 3.01 |
| Tyr7 O | Gln192 N2 | 3.52 |
| Leu8 O | Tyr151 OH | 3.72 |
| Leu8 O | Gln192 N2 | 2.90 |
| Asp9 O2 | Arg35 NH1 | 3.26 |
| Cys10 O | Gln192 N2 | 3.27 |
