# Supplementary material for: A Cyclic Peptidic Serine Protease Inhibitor: Increasing Affinity by Increasing Peptide Flexibility
Source: PLoS One. 2014 Dec 29;9(12):e115872. doi: 10.1371/journal.pone.0115872 (PMC4278837; doi:10.1371/journal.pone.0115872)
Supplement: S5 Table — Distances between mupain-1-16 residues and huPA-H99Y residues in the crystal structure. (DOC) [file pone.0115872.s009.doc]

**Supporting Table S5. Distances between mupain-1-16 residues and huPA-H99Y residues in the crystal structure**

| **Mupain-1-16 residue** | **huPA-H99Y residue** | **Distance, Å** |
| --- | --- | --- |
| Ala3 N | Thr97 O | 2.68 |
| Tyr4 N | Leu97 O | 2.98 |
| Tyr4 OH | Arg217 NH1 | 2.63 |
| Ser5 O | Tyr99 OH | 2.59 |
| [L-3-(*N*-amidino-4-piperidyl)alanine]6 N10 | Gly219 O | 2.97 |
| [L-3-(*N*-amidino-4-piperidyl)alanine]6 N10 | Asp189 O2 | 2.73 |
| [L-3-(*N*-amidino-4-piperidyl)alanine]6 N9 | Asp189 O1 | 2.71 |
| [L-3-(*N*-amidino-4-piperidyl)alanine]6 N9 | Ser190 O | 3.24 |
| [L-3-(*N*-amidino-4-piperidyl)alanine]6 N9 | Ser189 O | 2.66 |
| [L-3-(*N*-amidino-4-piperidyl)alanine]6 O | Gly193 N | 3.10 |
| [L-3-(*N*-amidino-4-piperidyl)alanine]6 O | Ser195 O | 3.36 |
| Tyr7 O | Gln192 N2 | 3.20 |
| Tyr7 OH | Arg35 NH1 | 2.86 |
| Tyr7 OH | Arg35 NH2 | 2.73 |
| Tyr7 OH | Cys58 O | 2.97 |
| Tyr7 O | Gln192 N2 | 3.19 |
| Leu8 O | Gln192 N2 | 3.49 |
| Asp9 O1 | Arg36 NH1 | 2.53 |
| Cys10 O | Gln192 N2 | 2.79 |
