# Supplementary material for: A Cyclic Peptidic Serine Protease Inhibitor: Increasing Affinity by Increasing Peptide Flexibility
Source: PLoS One. 2014 Dec 29;9(12):e115872. doi: 10.1371/journal.pone.0115872 (PMC4278837; doi:10.1371/journal.pone.0115872)
Supplement: S6 Table — Distances between mupain-1-16 D9A and huPA-H99Y residues in the crystal structure. (DOC) [file pone.0115872.s010.doc]

**Supporting Table S6. Distances between mupain-1-16 D9A and huPA-H99Y residues in the crystal structure**

| **Mupain-1-16 D9A residue** | **huPA H99Y residue** | **Distance, Å** |
| --- | --- | --- |
| Ala3 N | Thr97A O | 2.53 |
| Tyr4 N | Leu97B O | 3.06 |
| Tyr4 OH | Arg217 NH1 | 2.34 |
| Tyr4 OH | Arg217 N | 2.50 |
| Tyr4 O | Gly216 N | 2.90 |
| Tyr4 O | Gly216 O | 2.88 |
| Ser5 O | Tyr99 OH | 2.70 |
| [L-3-(*N*-amidino-4-piperidyl)alanine]6 N2 | Gly219 O | 2.74 |
| [L-3-(*N*-amidino-4-piperidyl)alanine]6 N2 | Ser190 O | 3.35 |
| [L-3-(*N*-amidino-4-piperidyl)alanine]6 N2 | Asp189 O2 | 3.03 |
| [L-3-(*N*-amidino-4-piperidyl)alanine]6 N1 | Asp189 O1 | 2.96 |
| [L-3-(*N*-amidino-4-piperidyl)alanine]6 N1 | Asp189 O2 | 3.35 |
| [L-3-(*N*-amidino-4-piperidyl)alanine]6 N1 | Ser190 O | 3.21 |
| [L-3-(*N*-amidino-4-piperidyl)alanine]6 N1 | Ser190 O | 2.67 |
| [L-3-(*N*-amidino-4-piperidyl)alanine]6 O | Gly193 N | 3.07 |
| [L-3-(*N*-amidino-4-piperidyl)alanine]6 O | Ser195 O | 2.83 |
| Tyr7 OH | Arg35 NH1 | 3.17 |
| Tyr7 OH | Arg35 NH2 | 3.25 |
| Tyr7 OH | Cys58 O | 2.91 |
| Tyr7 O | Gln192 N2 | 3.36 |
| Tyr7 N | Ser195 O | 3.48 |
| Leu8 O | Gln192 N2 | 3.27 |
| Asp9 O1 | Arg35 NH1 | 2.27 |
| Cys10 O | Gln192 N2 | 2.90 |
